# Supplementary material for: A novel multi-network approach reveals tissue-specific cellular modulators of fibrosis in systemic sclerosis
Source: Genome Med. 2017 Mar 23;9:27. doi: 10.1186/s13073-017-0417-1 (PMC5363043; doi:10.1186/s13073-017-0417-1)
Supplement: Supplementary file 1 — Table describing clinical characteristics of cohorts included in this study. (PDF 50 kb) [file 13073_2017_417_MOESM1_ESM.pdf]

| Dataset                          |               | Pendergrass     |                  | Milano        |                  | Hinichcliff      |               |                   | Bostwick         |               |                 |                  |               |               | Christmann       |                 | LSSc             |               | UCL              |                  | ESO               |                  | PBMC          |               |                   | Risbano           |               |                   |               |                   |    |  |
|----------------------------------|---------------|-----------------|------------------|---------------|------------------|------------------|---------------|-------------------|------------------|---------------|-----------------|------------------|---------------|---------------|------------------|-----------------|------------------|---------------|------------------|------------------|-------------------|------------------|---------------|---------------|-------------------|-------------------|---------------|-------------------|---------------|-------------------|----|--|
| All subjects                     |               | SSc<br>N = 22   | Control<br>N = 9 | SSc<br>N = 26 | Control<br>N = 6 | Morphea<br>N = 3 | SSc<br>N = 34 | Control<br>N = 11 | Morphea<br>N = 1 | SSc<br>N = 14 | SSc-PF<br>N = 8 | SSc-PAH<br>N = 9 | IPF<br>N = 13 | IPAH<br>N = 8 | Control<br>N = 9 | SSc-PF<br>N = 7 | Control<br>N = 4 | SSc<br>N = 12 | SSc-PAH<br>N = 8 | SSc-ILD<br>N = 6 | SSc<br>N = 10     | Control<br>N = 5 | SSc<br>N = 16 | SSc<br>N = 21 | SSc-PAH<br>N = 15 | Control<br>N = 10 | SSc<br>N = 10 | SSc-PAH<br>N = 10 | IPAH<br>N = 8 | Control<br>N = 10 |    |  |
| Age*, mean (SD)                  |               | 46.1 (8.1)      | NA               | 51.8 (10.4)   | 40.2 (10.6)      | 50.7 (7.9)       | 47.7 (11.7)   | 41.2 (11.8)       | 47               | 49.1 (9.2)    | 48.1 (7.5)      | 52.1 (9.1)       | NA            | NA            | NA               | 44.7 (9.3)      | NA               | 56.5 (12.8)   | 59 (13.4)        | 56.5 (17.8)      | NA                | NA               | 52.3 (8.7)    | 49.5 (10.9)   | 55.4 (6.4)        | NA                | NA            | NA                | NA            | NA                | NA |  |
| Sex, n (%) women                 |               | 17 (77.3)       | NA               | 21 (87.5)     | 5 (83.3)         | 3 (100.0)        | 32 (94.1)     | 7 (63.6)          | 1 (100.0)        | 11 (78.6)     | 5 (62.5)        | 5 (55.6)         | NA            | NA            | NA               | NA              | NA               | 9 (75.0)      | 7 (87.5)         | 4 (100.0)        | NA                | NA               | 15 (93.8)     | 17 (81.0)     | 12 (80.0)         | 3 (30.0)          | NA            | NA                | NA            | NA                | NA |  |
| SSc patients only                |               | N = 22          |                  | N = 24        |                  | N = 34           |               |                   | N = 31           |               |                 |                  |               |               | N = 7            |                 | N = 24           |               | N = 10           |                  | N = 16            |                  | N = 36        |               |                   | N = 20            |               |                   |               |                   |    |  |
| SSc subtype, n (%) diffuse       |               | 22 (100.0)      |                  | 17 (70.8)     |                  | 31 (91.2)        |               |                   | 14 (45.2)        |               |                 |                  |               |               | 2 (28.6)         |                 | 0 (0.0)          |               | 0 (0.0)          |                  | 10 (62.5)         |                  | 0 (0.0)       |               |                   | NA                |               |                   |               |                   |    |  |
| SSc disease duration*, mean (SD) |               | 18.4 (13.1) mos |                  | 7.7 (7.2) yrs |                  | 52.7 (82.4) mos  |               |                   | NA               |               |                 |                  |               |               | 74 (78.6) mos    |                 | NA               |               | NA               |                  | 105.0 (105.3) mos |                  | NA            |               |                   | NA                |               |                   |               |                   |    |  |
| SSc autoantibody, n (%) positive |               |                 |                  |               |                  |                  |               |                   |                  |               |                 |                  |               |               |                  |                 |                  |               |                  |                  |                   |                  |               |               |                   |                   |               |                   |               |                   |    |  |
|                                  | Scl-70        | 5 (13.6)        |                  | 5 (20.8)      |                  | 9 (26.5)         |               |                   | 6 (19.4)         |               |                 |                  |               |               | 2 (28.6)         |                 | NA               |               | NA               |                  | NA                |                  | 6 (37.5)      |               |                   | NA                |               |                   | NA            |                   |    |  |
|                                  | RNA Pol III   | 3 (13.6)        |                  | 9 (28.5)      |                  | 2 (5.9)          |               |                   | 2 (6.5)          |               |                 |                  |               |               | NA               |                 | NA               |               | NA               |                  | NA                |                  | 6 (37.5)      |               |                   | NA                |               |                   | NA            |                   |    |  |
|                                  | ACA           | 1 (4.5)         |                  | 2 (8.3)       |                  | 2 (5.9)          |               |                   | 6 (19.4)         |               |                 |                  |               |               | NA               |                 | NA               |               | NA               |                  | NA                |                  | NA            |               |                   | NA                |               |                   | NA            |                   |    |  |
| SSc intrinsic subset, n (%)      |               |                 |                  |               |                  |                  |               |                   |                  |               |                 |                  |               |               |                  |                 |                  |               |                  |                  |                   |                  |               |               |                   |                   |               |                   |               |                   |    |  |
|                                  | Inflammatory  | 9 (40.9)        |                  | 5 (20.8)      |                  | 17 (50.0)        |               |                   | NA               |               |                 |                  |               |               | NA               |                 | NA               |               | NA               |                  | NA                |                  | 6 (37.5)      |               |                   | NA                |               |                   | NA            |                   |    |  |
|                                  | Proliferative | 8 (36.4)        |                  | 11 (45.8)     |                  | 7 (20.6)         |               |                   | NA               |               |                 |                  |               |               | NA               |                 | NA               |               | NA               |                  | NA                |                  | 4 (25.0)      |               |                   | NA                |               |                   | NA            |                   |    |  |
|                                  | Normal-like   | 2 (9.1)         |                  | 4 (16.7)      |                  | 7 (20.6)         |               |                   | NA               |               |                 |                  |               |               | NA               |                 | NA               |               | NA               |                  | NA                |                  | NA            |               |                   | NA                |               |                   | NA            |                   |    |  |
|                                  | Limited       | NA              |                  | 3 (12.5)      |                  | 2 (5.9)          |               |                   | NA               |               |                 |                  |               |               | NA               |                 | NA               |               | NA               |                  | NA                |                  | NA            |               |                   | NA                |               |                   | NA            |                   |    |  |

\* At base biopsy
